# Supplementary figures and images for: Protocadherin-1 is expressed in the notochord of mouse embryo but is dispensable for its formation
Source: PubMed Central journal article supplement — Biochem Biophys Rep. 2021 Jun 15;27:101047. doi: 10.1016/j.bbrep.2021.101047 (PMC8219654; doi:10.1016/j.bbrep.2021.101047), 2021-06-15

# Uncropped Western blotting data for Fig. 3D

PCDH1

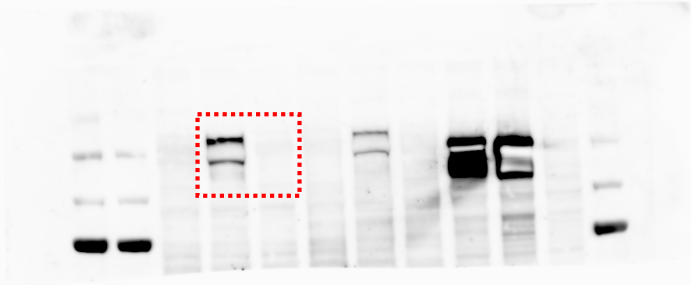

GAPDH

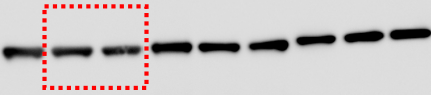

Supplement: mmc2.pdf [file mmc2.pdf]
